# Supplementary material for: Jasmonic acid is a downstream component in the modulation of somatic embryogenesis by Arabidopsis Class 2 phytoglobin
Source: PubMed Central journal article supplement (PMC4809281; doi:10.1093/jxb/erw022), 2016-03-09
Supplement: supp_erw022_supplementary_figures_S1_S8_Table_S1.pdf [file supp_erw022_supplementary_figures_S1_S8_Table_S1.pdf]

Jasmonic acid is a downstream component in the modulation of somatic embryogenesis by the *Arabidopsis* class 2 phytoalbumin

Mohamed M. Mira, Owen SD Wally, Mohamed Elhiti, El-Shanshory Adel, Dhadi S. Reddy, Robert D. Hill and Claudio Stasolla

Supplemental Figures and Tables

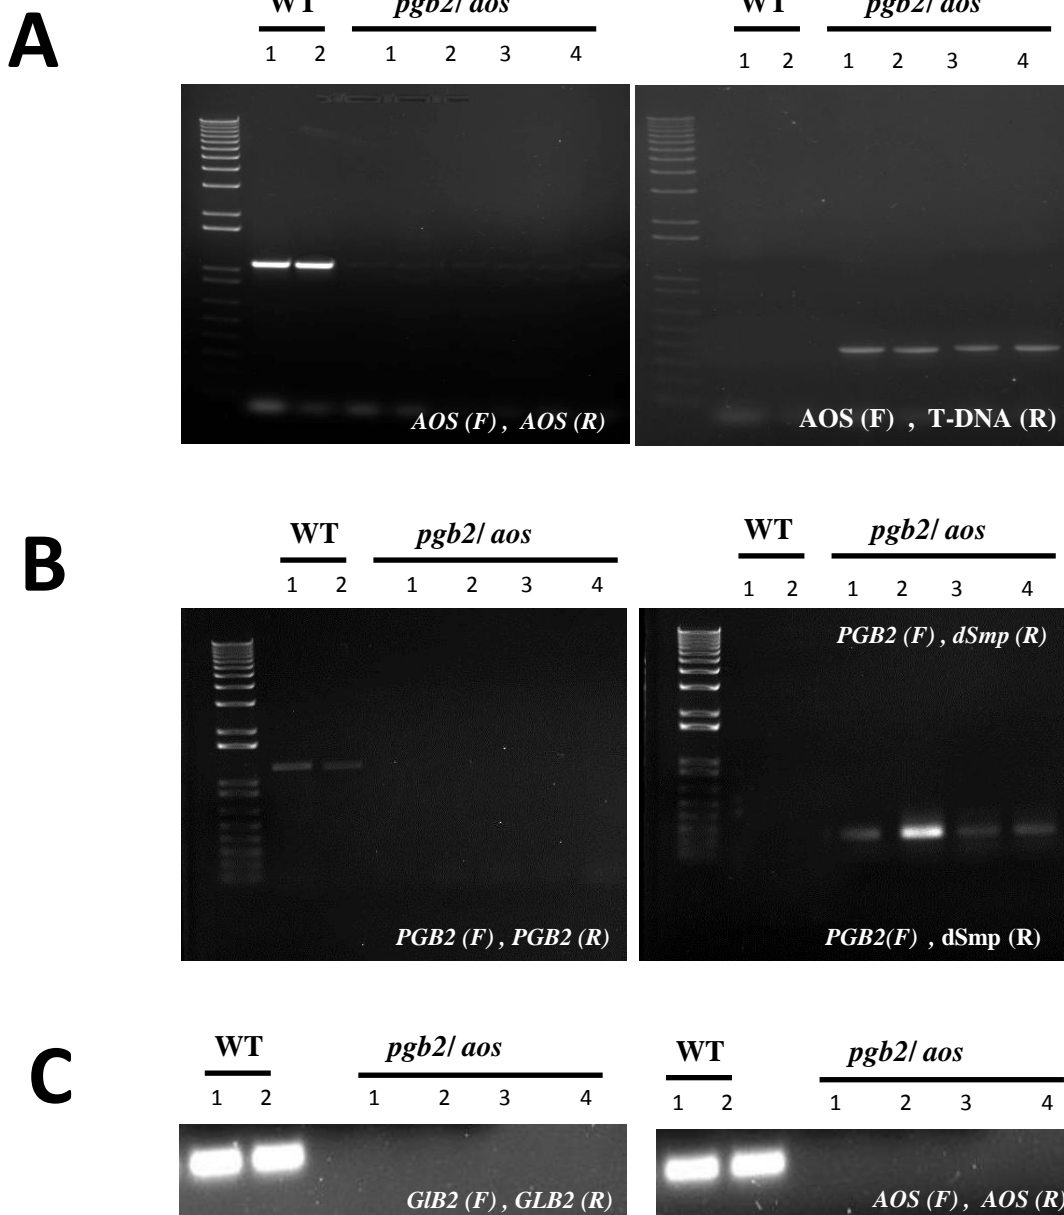

**Supplemental Fig.1** . Characterization of *pgb2/ aos* double mutant lines produced by crossing the *pgb2* T-DNA line and the *aos* T-DNA line (SALK 017756). **(A)** PCR analysis of DNA to detect *AOS* (left panel) and the T-DNA insertion disrupting *AOS* (right panel). **(B)** PCR analysis of DNA to detect *PGB2* (left panel) and the T-DNA insertion disrupting *Pgb2* (dSmp) (right panel). **(C)** PCR analysis of cDNA synthesized from RNA of tissue cultured for 7 days on induction medium. Primers are shown at the bottom right corner of each gel. Primers used for amplification: *AOS*(F), 5'-CGAGAAATTAACGGAGCTTCC-3'; *AOS*(R), 5'-CTAACCGGAGGCTACCGTATC-3'; *TDNA*(R), 5'-ATT TTG CCG ATT TCG GAAC-3'; *PGB2*(F), 5'-CTCAAAGCTCATGCTGTAAAGTC-3'; *PGB2*(R), TGTGTCAGCCACTACCACCT-3'; *dSmp*(R), 5'-ACCGTCGACTACCTTTTTTCTTG TAGTG-3.

**A**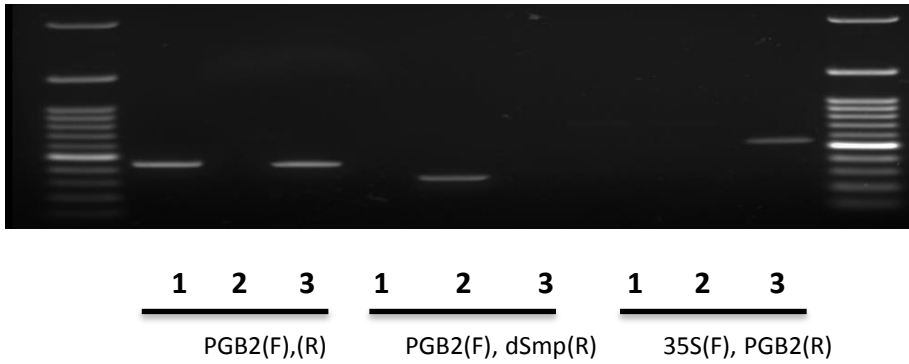**B**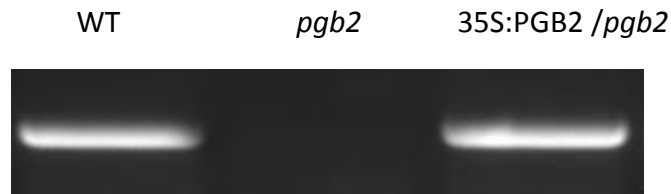**C**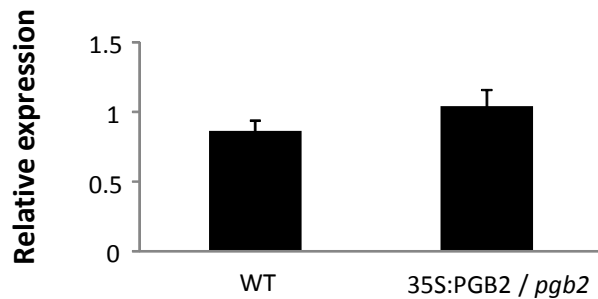

**Supplemental Fig.2** . Characterization of the 35S:PGB2 / *pgb2* line produced by introducing *PGB2*, driven by the 35S promoter, into the *pgb2* line. **(A)** PCR analysis of DNA to detect the presence of PGB2 [PGB2 (F), (R) primers]; the T-DNA insertion disrupting *PGB2* (dSmp) [PGB2(F), dSmp(R) primers], and the 35S:PGB2 insert [35S (F), PGB2(R) primers]. 1, WT; 2 *pgb2*; 3, 35S:PGB2 / *pgb2*. Primers used for amplification : PGB2(F), 5'-ATGGGAGAGATTGGGTTTACAG -3'; PGB2(R), 5'-TTATGACTCTTCTTGTTTCATCTCG-3'; 35S(F), 5'-CTATCCTTCGCAAGACCCTTC-3'; and dSmp(R), 5'-ACCGTCGACTACCTTTTTTCTTGTAGTG-3. **(B)** Amplification of PGB2 by PCR from cDNA prepared from samples at 7 days on induction medium. Primers used: 5'-CTCAAAGCTCATGCTGTAAAGT-3' and 5'-TGTGTCAGCCACTACCACCT-3'. **(C)** Relative expression of PGB2 in WT and 35S:PGB2 / *pgb2* tissues from samples at 7 days on induction medium. Primers used: 5'-CTCAAAGCTCATGCTGTAAAGT-3' and 5'-TGTGTCAGCCACTACCACCT-3'.

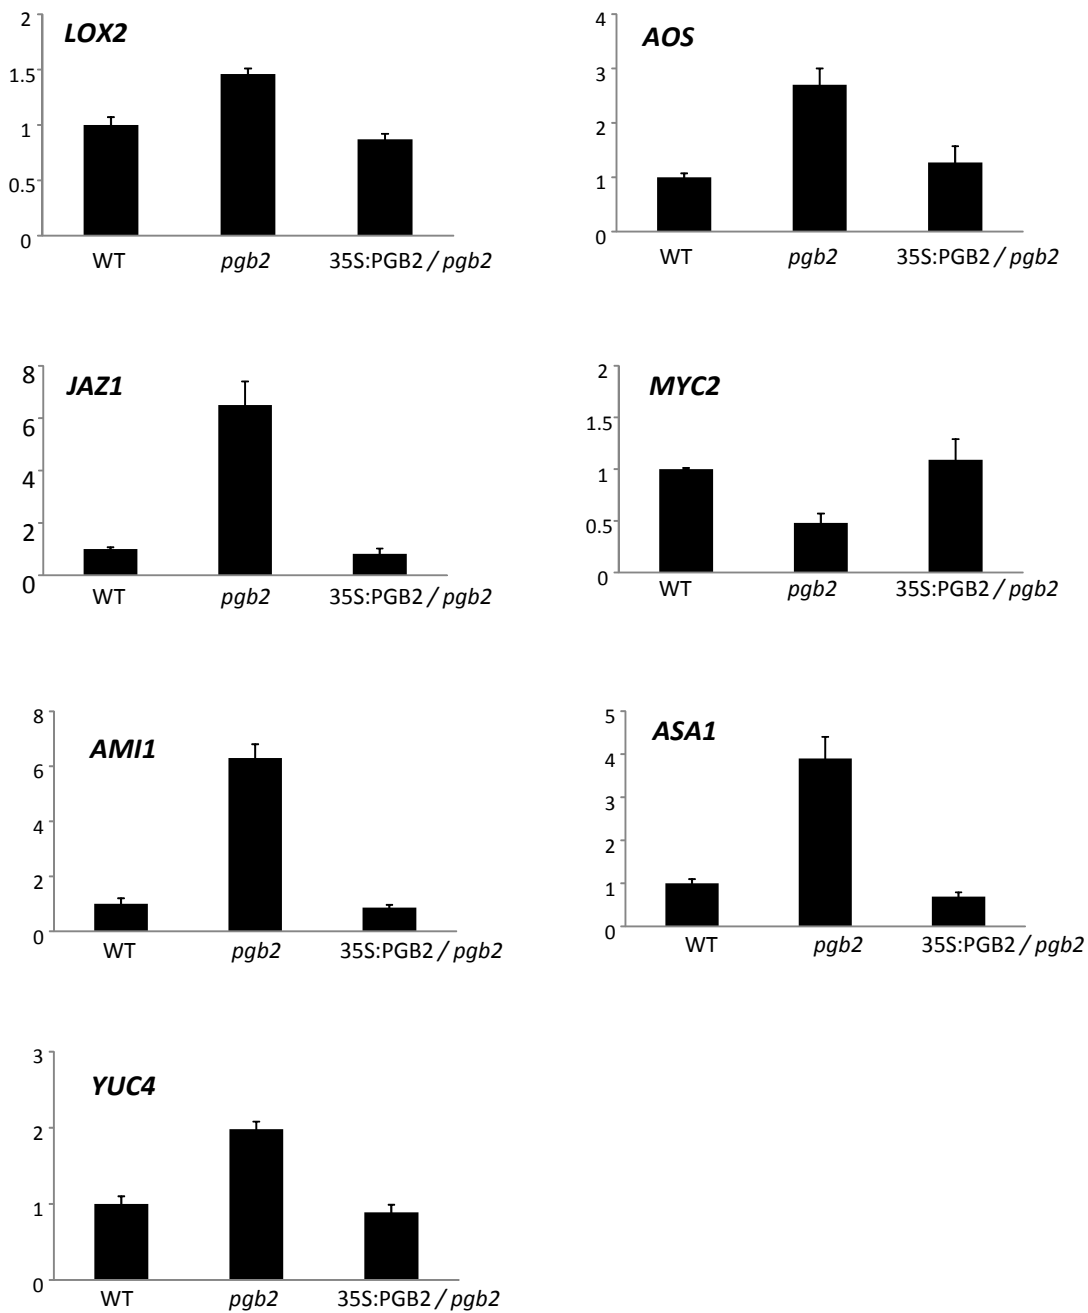

**Supplemental Fig. 3.** Expression level by quantitative (q)RT-PCR of several genes participating in jasmonic acid and auxin synthesis and signaling (see text for the names of the genes) in the WT, *pgb2*, and 35S:PGB2 / *pgb2* lines at day 7 on induction medium. Values are means  $\pm$  SE of at least three biological replicates and are normalized to the value of WT set at 1.

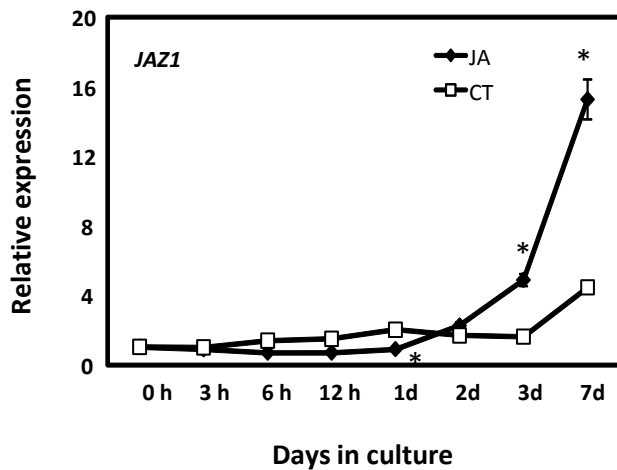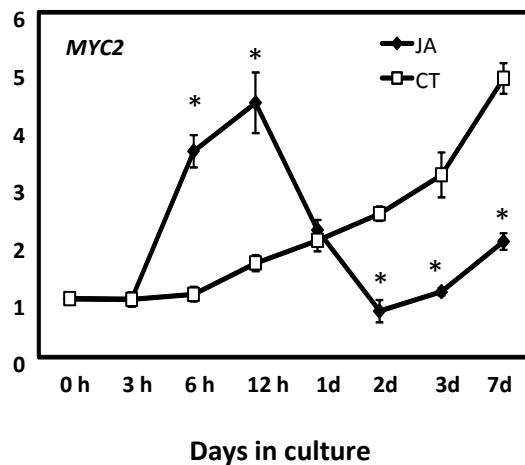

**Supplemental Fig. 4.** Effects of JA on the expression level of *JAZ1* and *MYC2*. Explants were cultured for 7 days on induction medium and then exposed to JA for the following 7 days. Values are means  $\pm$  SE of at least three biological replicates and are normalized to the value of control at time 0 set at 1. \* indicates statistically significant differences ( $P \leq 0.005$ ) from the control value of the respective time in culture.

**A**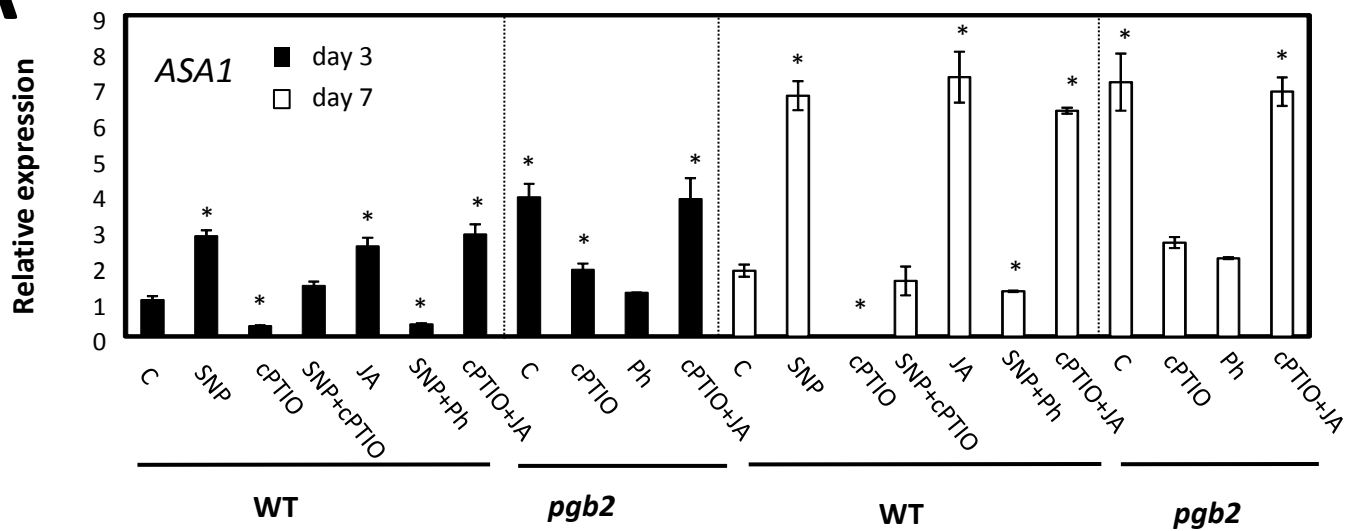**B**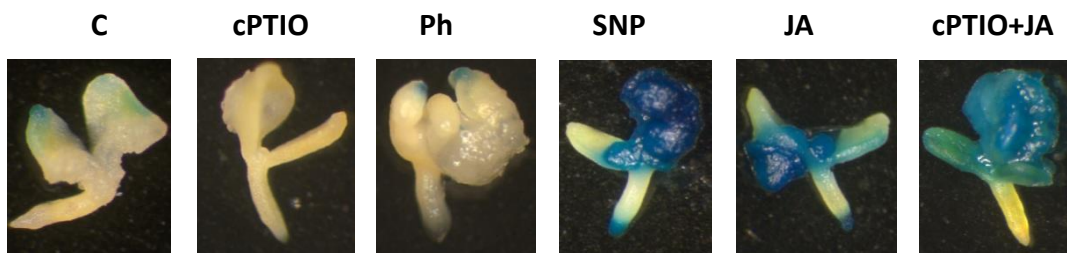**C**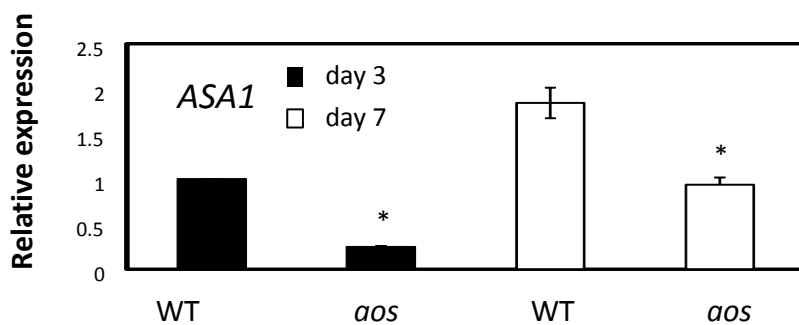**D**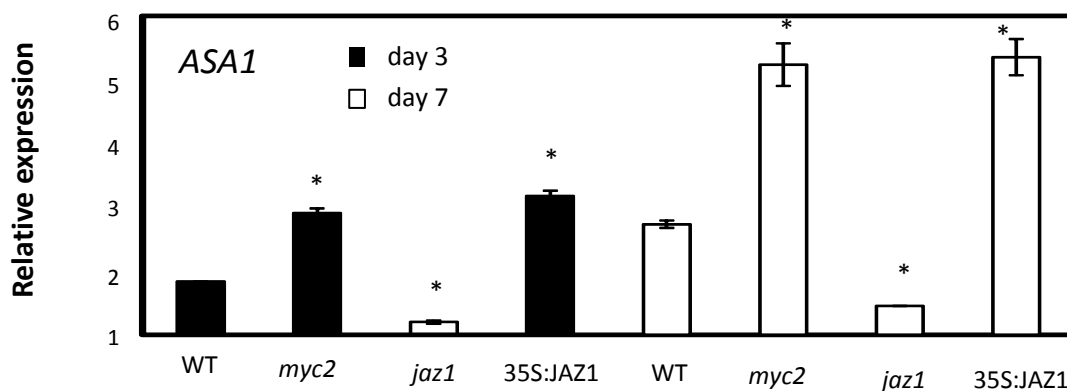

**Supplemental Figure 5.** Effects of jasmonic acid (JA) and nitric oxide (NO) on *ASA1* expression and localization. **(A)** Expression level by quantitative (q)RT-PCR of the auxin biosynthetic gene *anthranilate synthase-a subunit (ASA1)* at day 3 and 7 in the induction medium of somatic embryogenesis. WT and *pgb2* tissues were cultured in media with altered levels of NO and JA using pharmacological treatments described in Fig. 2. Values are means  $\pm$  SE of at least three biological replicates and are normalized to the value of WT(C) of day 3 set at 1. \* indicates statistically significant differences ( $P \leq 0.005$ ) from the WT(C) value of the respective day in culture. **(B)** Localization patterns of *ASA1* by GUS staining at day 7 on induction medium. Tissue was subjected to the indicated pharmacological treatments. **(C)** Expression level by quantitative (q)RT-PCR of *ASA1* in WT and *aos* lines at day 3 and 7 on induction medium. Values are means  $\pm$  SE of at least three biological replicates and are normalized to the value of WT of day 3 set at 1. \* indicates statistically significant differences ( $P \leq 0.005$ ) from the WT value of the respective day in culture. **(D)** Expression level by quantitative (q)RT-PCR of *ASA1* at day 3 and 7 in the induction medium of somatic embryogenesis in the WT, *myc2*, *jaz1*, and 35S:JAZ1 lines. Values are means  $\pm$  SE of at least three biological replicates and are normalized to the value of WT of day 3 set at 1. \* indicates statistically significant differences ( $P \leq 0.005$ ) from the WT value of the respective day in culture.

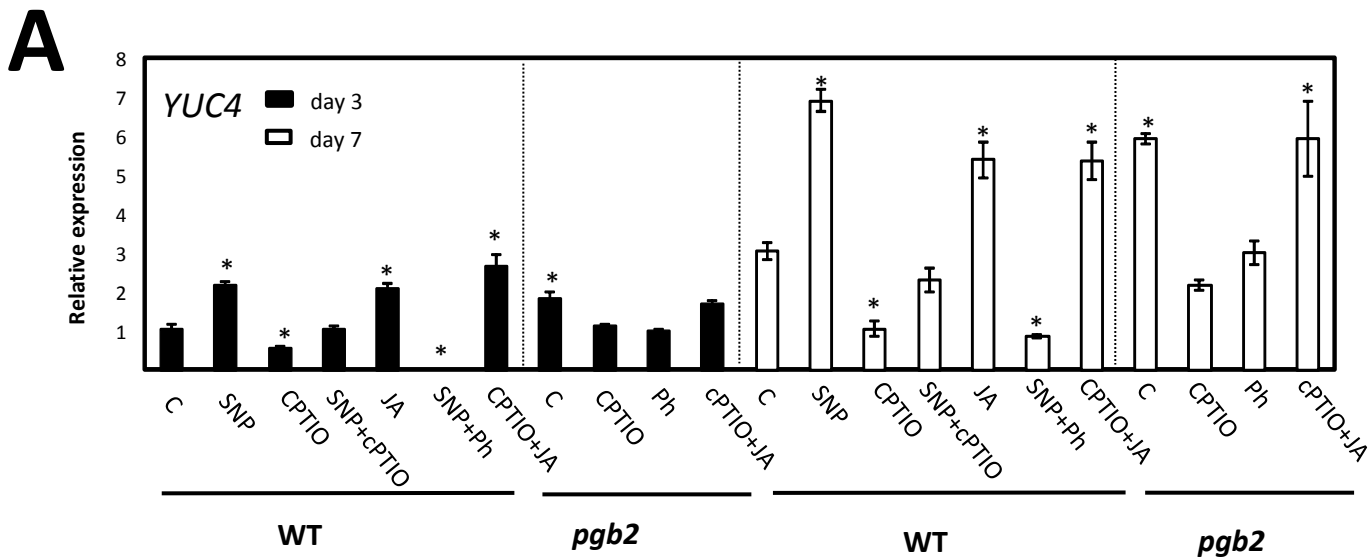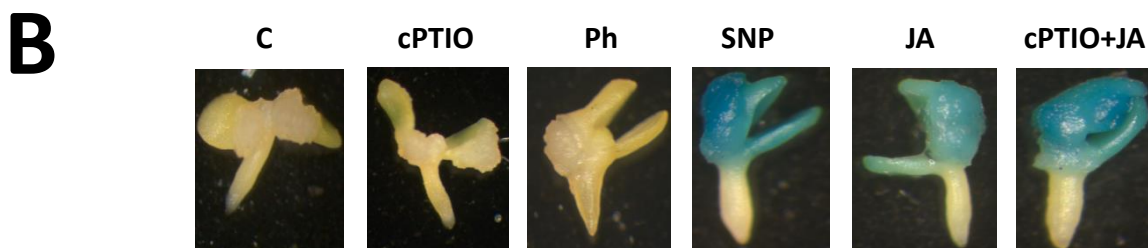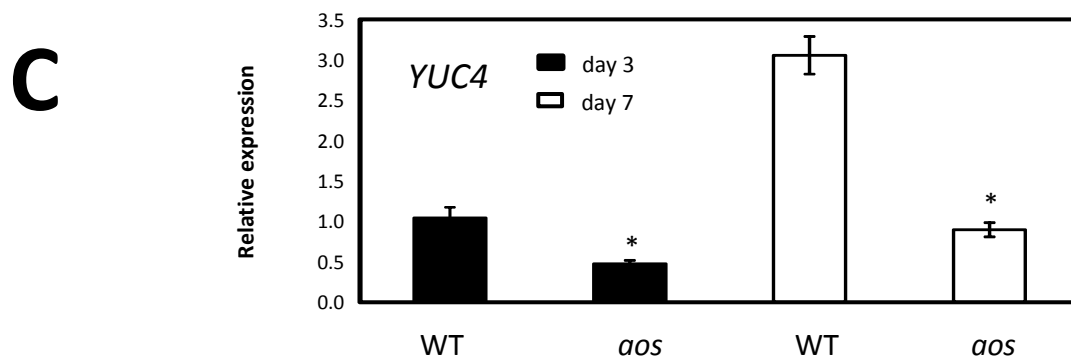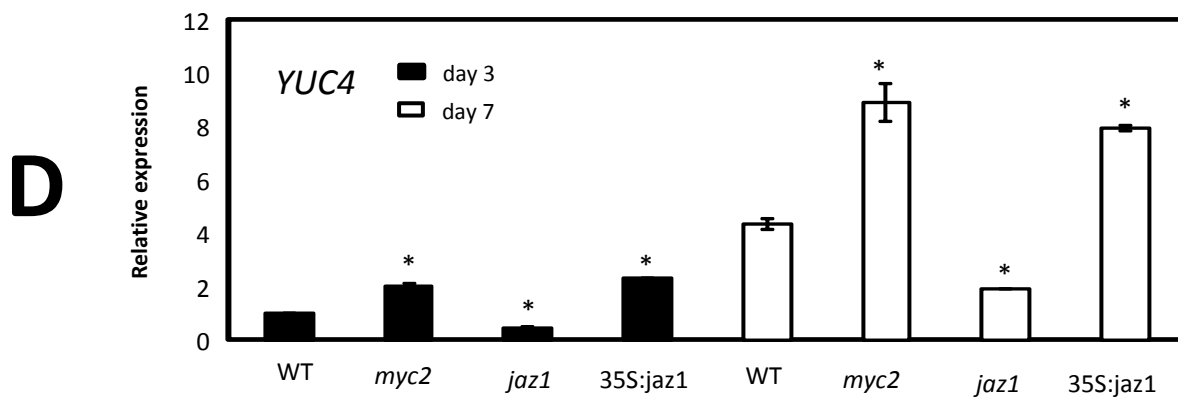



**Supplemental Fig. 6.** Effects of jasmonic acid (JA) and nitric oxide (NO) on *YUC4* expression and localization.

**(A)** Expression level by quantitative (q)RT-PCR of *YUC4* at day 3 and 7 in the induction medium of somatic embryogenesis. WT and *pgb2* tissues were cultured in media with altered levels of NO and JA using pharmacological treatments described in Fig. 2. Values are means  $\pm$  SE of at least three biological replicates and are normalized to the value of WT(C) of day 3 set at 1. \* indicates statistically significant differences ( $P \leq 0.005$ ) from the WT(C) value of the respective day in culture.

**(B)** Localization patterns of *YUC4* by GUS staining at day 7 on induction medium. Tissue was subjected to the indicated pharmacological treatments.

**(C)** Expression level by quantitative (q)RT-PCR of *YUC4* in the WT and *aos* line at day 3 and 7 on induction medium. Values are means  $\pm$  SE of at least three biological replicates and are normalized to the value of WT of day 3 set at 1. \* indicates statistically significant differences ( $P \leq 0.005$ ) from the WT value of the respective day in culture. **(D)** Expression level by quantitative (q)RT-PCR of *YUC4* at day 3 and 7 in the induction medium of somatic embryogenesis in the WT, *myc2*, *jaz1*, and 35S:JAZ1 lines.

Values are means  $\pm$  SE of at least three biological replicates and are normalized to the value of WT of day 3 set at 1. \* indicates statistically significant differences ( $P \leq 0.005$ ) from the WT value of the respective day in culture.

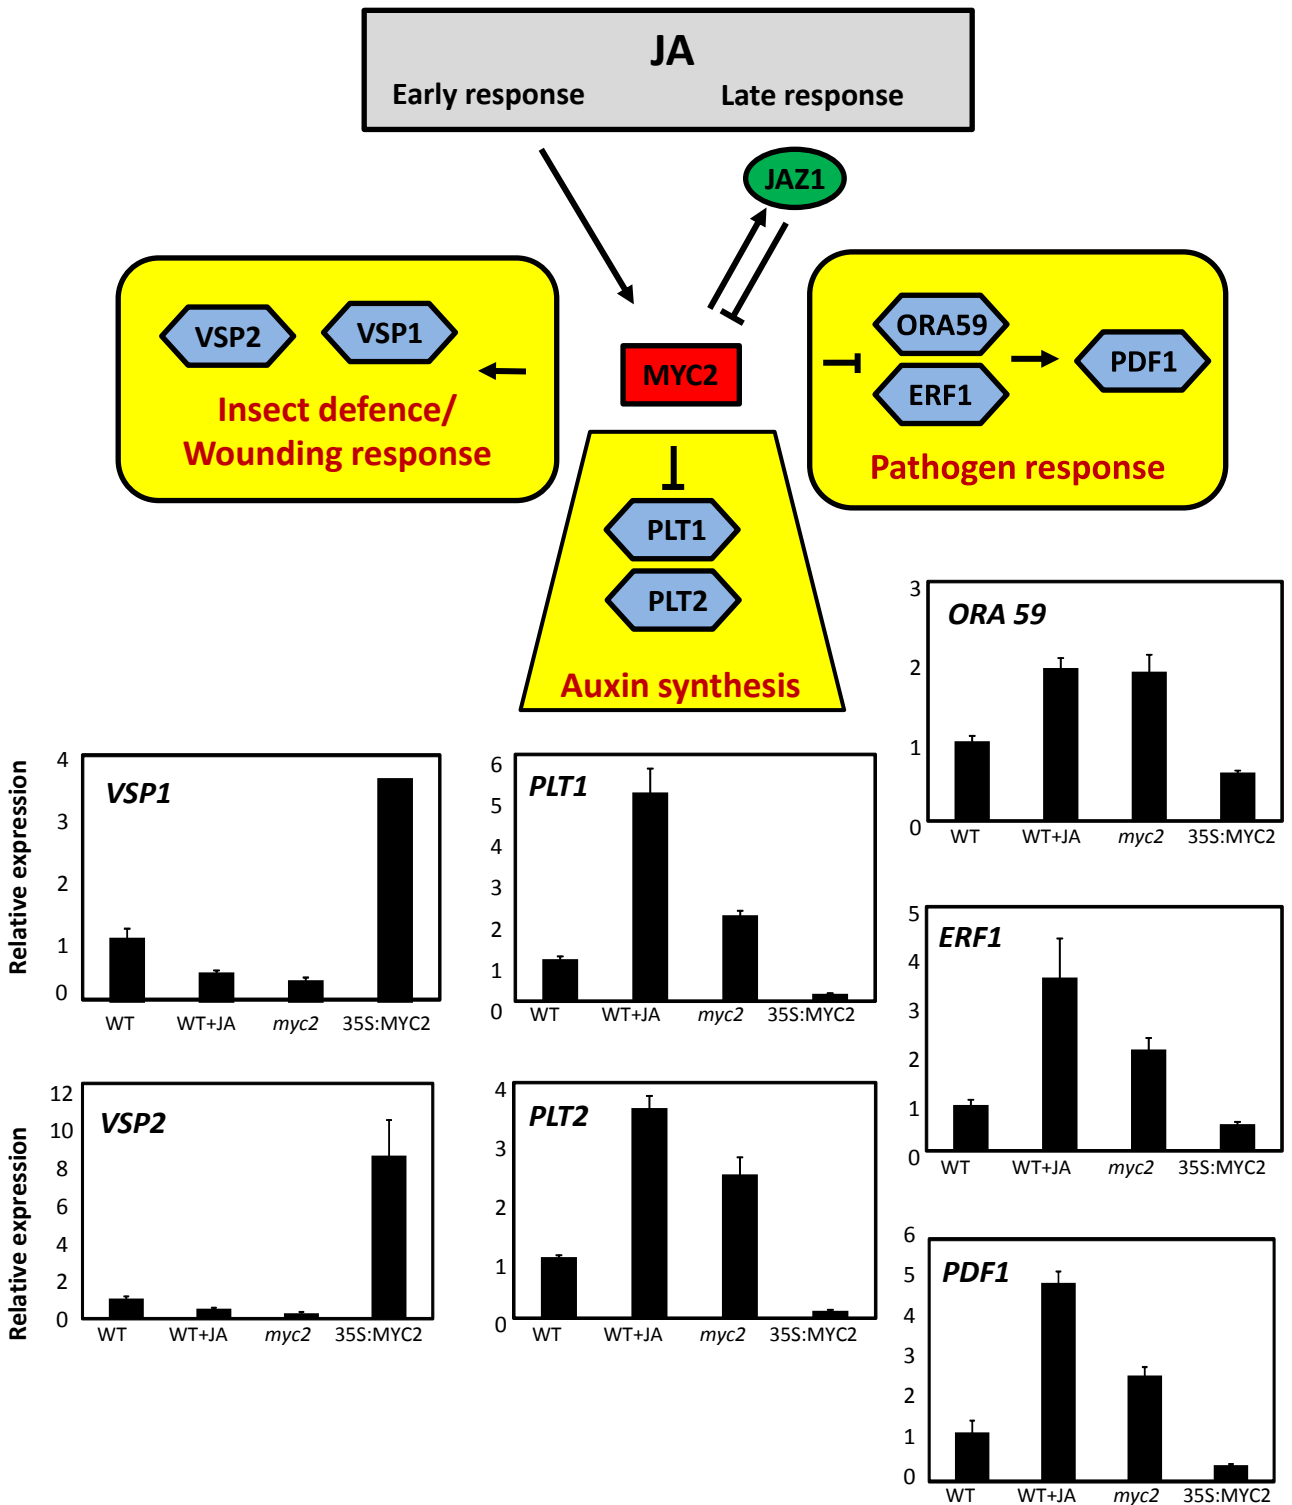

**Supplemental Fig. 7.** Diagram showing the effects of the “early” and “late” JA response on genes participating in insect defense/wounding response, pathogen response, and auxin synthesis. The expression of the genes participating in these responses (see the text for details) was measured at day 7 on induction medium in the WT line treated with JA and in lines with suppressed (*myc2*) or increased (35S:MYC2) levels of MYC2. Expression values are means of three biological replicated and are normalized to the value of WT set at 1.

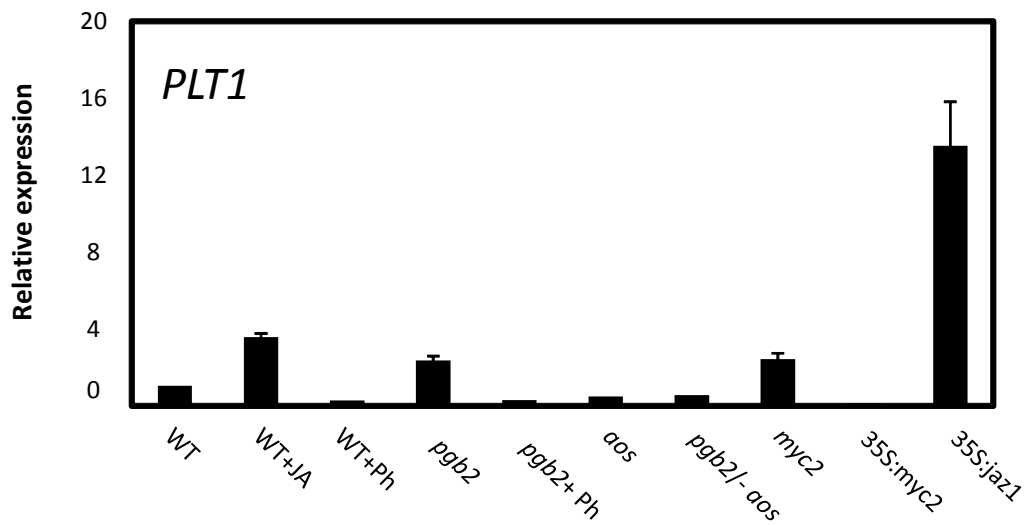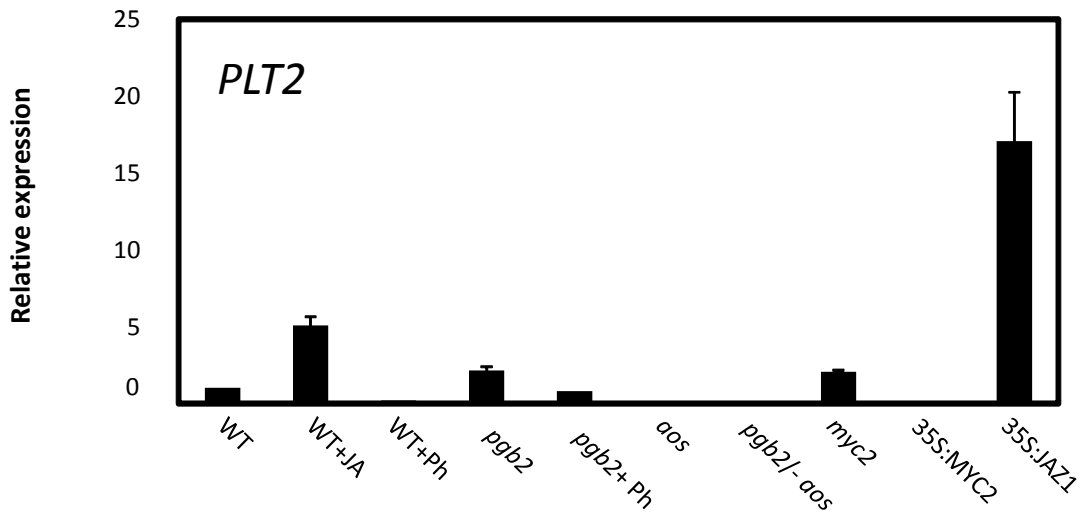

**Supplemental Fig. 8.** Expression levels of *PLETHORA 1* and *2* in day 7 explants. Gene expression was measured by (q)RT-PCR in the WT, *pgb2*, *aos*, *myc2* and 35S:MYC2 lines. Values are means of three biological replicates and are normalized to the value of WT set at 1.

**Supplemental Table 1.** List of primers used for genotyping and for expression studies

| <b>primers for genotyping</b> |  |                                 |  |             |                                |
|-------------------------------|--|---------------------------------|--|-------------|--------------------------------|
| AOS-F                         |  | CGAGAAATTAACGGAGCTTCC           |  | AT5G42650.1 | ALLENE OXIDE SYNTHASE          |
| AOS-R                         |  | CTAACCGGAGGCTACCGTATC           |  | AT5G42650.1 | ALLENE OXIDE SYNTHASE          |
| LBb1-3                        |  | ATT TTG CCG ATT TCG GAA C       |  |             | T-DNA insertion                |
|                               |  |                                 |  |             |                                |
| PGB2-F                        |  | CTCAAAGCTCATGCTGTTAAAGTC        |  | AT3G10520   | hemoglobin-2                   |
| PGB2-R                        |  | TGTGTCAGCCACTACCACCT            |  | AT3G10520   | hemoglobin-2                   |
| dSmp-R                        |  | 5-ACCGTCGACTACCTTTTTTCTGTAGTG-3 |  |             |                                |
|                               |  |                                 |  |             |                                |
| <b>primers for RT-PCR</b>     |  |                                 |  |             |                                |
| AtUBQ10-F                     |  | AAC TTTGGTGGTTTGTGTTTTGG        |  | AT4G05320   | UBIQUITIN 10                   |
| AtUBQ10-R                     |  | TCGACTTGT CATTAGAAAGAAAGAGATAA  |  | AT4G05320   | UBIQUITIN 10                   |
|                               |  |                                 |  |             |                                |
| MYC2-F                        |  | ACCACGTCGAAGCAGAGACAAA          |  | AT1G32640.1 | JASMONATE INSENSITIVE 1        |
| MYC2-R                        |  | TGTAAGCGATTGCGTCACCGAGTA        |  | AT1G32640.1 | JASMONATE INSENSITIVE 1        |
| JAZ1-F                        |  | CCGGTTCTTGGAGAAGAGAAAG          |  | AT1G19180.1 | JASMONATE-ZIM-DOMAIN PROTEIN 1 |
| JAZ1-R                        |  | CCTGTGGTTTGAGGGTTTGA            |  | AT1G19180.1 | JASMONATE-ZIM-DOMAIN PROTEIN 1 |
|                               |  |                                 |  |             |                                |
| LOX2-F                        |  | ATGCTACGTCATGCTGGCTATGGA        |  | AT3G45140   | LIPOXYGENASE 2                 |
| LOX2-R                        |  | TGCCGCTATTATGTATGGCTCCGT        |  | AT3G45140   | LIPOXYGENASE 2                 |
| AOS-F                         |  | ACGACGCGGCGTTTAAAGTCAAAG        |  | AT5G42650   | ALLENE OXIDE SYNTHASE          |
| AOS-R                         |  | ACGAATCTCTCCGGCACAACTCA         |  | AT5G42650   | ALLENE OXIDE SYNTHASE          |
| PDF1.2-F                      |  | GTTCTCTTTGCTGCTTTTCGAC          |  | AT5G44420   | PLANT DEFENSIN 1.2             |
| PDF1.2-R                      |  | GCAAACCCCTGACCATGT              |  | AT5G44420   | PLANT DEFENSIN 1.2             |
|                               |  |                                 |  |             |                                |
| ASA1-F                        |  | ACAAGGATGCTAACAAACGGCGTG        |  | AT1G19920   | ATP SULFURYLASE ARABIDOPSIS 1  |
| ASA1-R                        |  | TCTGGCACTCACAGTGTTCTGCTT        |  | AT1G19920   | ATP SULFURYLASE ARABIDOPSIS 1  |
| Yuc4-F                        |  | CTAACGGATGGAAGGAGAGAAG          |  | AT4G32540.1 | YUCCA 4                        |
| Yuc4-R                        |  | GCGATCTTAACGGCGTCATA            |  | AT4G32540.1 | YUCCA 4                        |
| AMI1-F                        |  | ATCTCGTCGGTGAAGCCAGAGTTT        |  | AT1G08980   | AMIDASE 1                      |
| AMI1-R                        |  | CCGAGCAAAGTTGAAAGAGCCGTT        |  | AT1G08980   | AMIDASE 1                      |
| PGB2-F                        |  | CTCAAAGCTCATGCTGTTAAAGTC        |  | AT3G10520   | Hemoglobin-2                   |
| PGB2-R                        |  | TGTGTCAGCCACTACCACCT            |  | AT3G10520   | Hemoglobin-2                   |
